# Supplementary material
Source: publisher site journal article supplement (https://www.dovepress.com/article/580072)
Supplement: Supplementary file 1 [file 580072%20Supplementary%20Material%201.docx]

**Supplementary Table S1. Codes Used for Cohort Definition, Exposure, and Outcomes**

| Category | Variable / Definition | Coding System | Codes |
| --- | --- | --- | --- |
| Inclusion criteria | Age ≥18 years | Demographics | ≥18 years |
|  | Head and neck malignancy | ICD-10-CM | C00–C14, C30, C31, C32 |
|  | Free flap reconstruction (index surgery) | CPT | 15756, 15757, 15758, 15842, 20955, 20956, 20962, 20969, 20970 |
| Exposure (index event) | Sugammadex use | RxNorm | 1726988 |
|  | Neostigmine use | RxNorm | 7315 |
| Primary outcome | Acute respiratory failure | ICD-10-CM | J96.0 |
| Secondary outcomes | Composite pulmonary complications | ICD-10-CM | J12–J18, J69, J81 |
|  | ICU admission | CPT | 1013729 |
|  | Major adverse cardiovascular events (MACE) | ICD-10-CM | I46, I21, I63 |
|  | Flap failure / reoperation | CPT | 15756, 15757, 15758, 15842, 20955, 20956, 20962, 20969, 20970, 1031037 |
